# Supplementary material for: Tuning the electrochemical properties of a boron and nitrogen codoped nanodiamond rod array to achieve high performance for both electro-oxidation and electro-reduction
Source: Royal Society of Chemistry journal article supplement (doi:10.1039/c3ta13243a), 2013-01-01
Supplement: c3ta13243a.pdf [file c3ta13243a.pdf]

## Supplementary Information

# **Tuning the electrochemical properties of boron and nitrogen codoped nanodiamond rod array to achieve high performance for both electro-oxidation and electro-reduction**

*Yanming Liu, Shuo Chen, Xie Quan,\* Huimin Zhao, Hongtao Yu, and Yaobin Zhang*

Key Laboratory of Industrial Ecology and Environment Engineering (Ministry of Education, China), School of Environmental Science and Technology, Dalian University of Technology, Dalian 116024, China

\*corresponding author e-mail: [quanxie@dlut.edu.cn](mailto:quanxie@dlut.edu.cn)

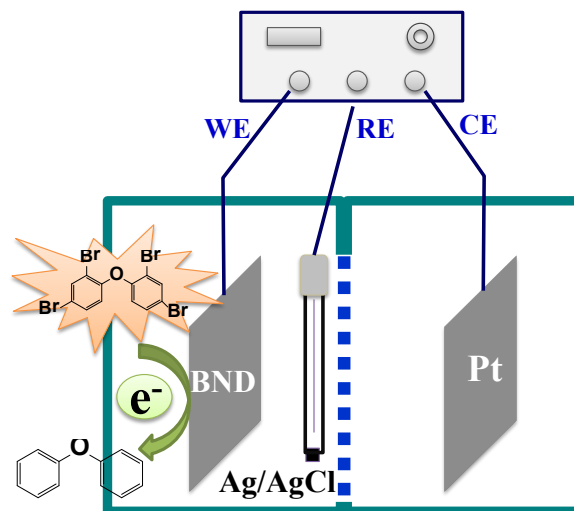

**Fig. S1** Schematic diagram of the designed double-compartment cell for BDE-47 electro-reduction.

**Table S1** The B and N contents of different electrocatalysts.

|           | BDD   | NDD   | BND1  | BND2  |
|-----------|-------|-------|-------|-------|
| B content | 1.89% | 0     | 1.96% | 1.90% |
| N content | 0     | 0.85% | 0.81% | 1.06% |

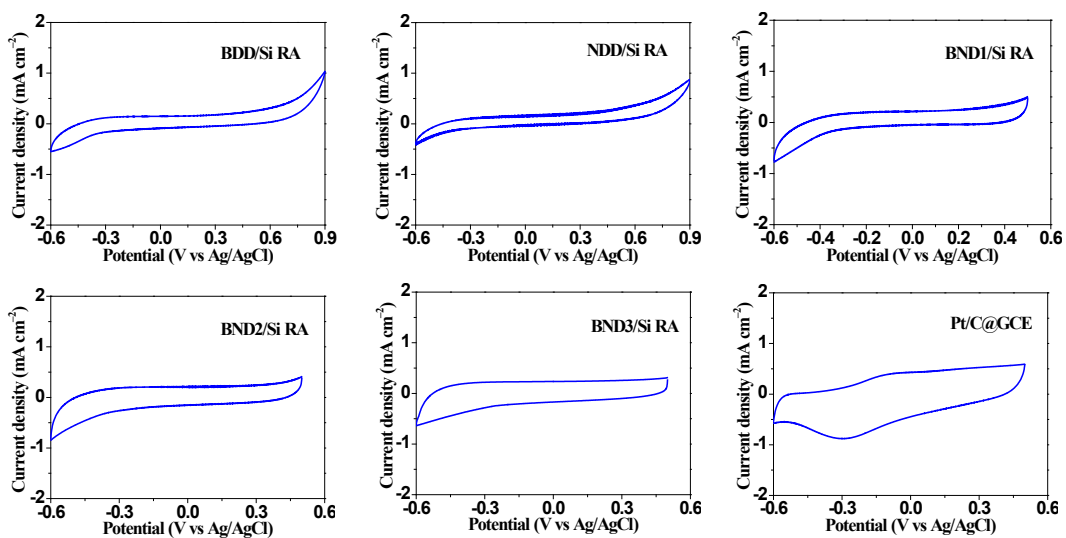

**Fig. S2** Cyclic voltammograms of various electrodes in 0.1 M KOH electrolyte at a scan rate of 50 mV s<sup>-1</sup>.

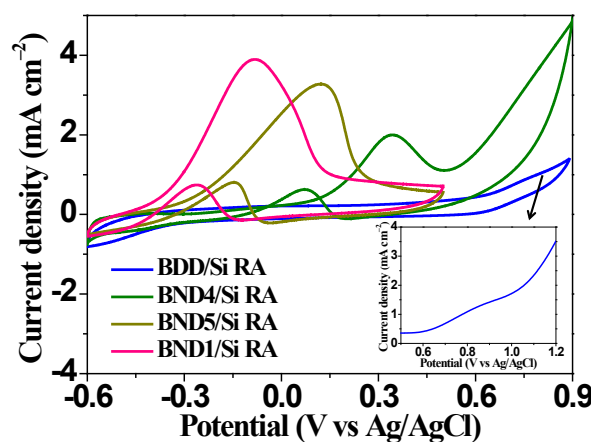

**Fig. S3** The cyclic voltammograms of BDD/Si RA, BND4/Si RA, BND5/Si RA and BND1/Si RA for methanol oxidation in 0.1 M KOH electrolyte containing 1.0 M CH<sub>3</sub>OH at a scan rate of 50 mV s<sup>-1</sup>.

The BND/Si RAs with N content 0.2%, B/C = 0.01 (defined as BND4/Si RA) and N content 0.5%, B/C = 0.01 (defined as BND5/Si RA) in the precursors were prepared, and their cyclic voltammograms for methanol oxidation were shown in Fig. S3. It reveals the peak potential for methanol oxidation is positively shifted from 0.85 V on BDD/Si RA to 0.34 V on BND4/Si RA. When the N content increases from 0.3% to 0.7%, the peak potential is further positively shifted. Meanwhile, the current density is improved gradually.

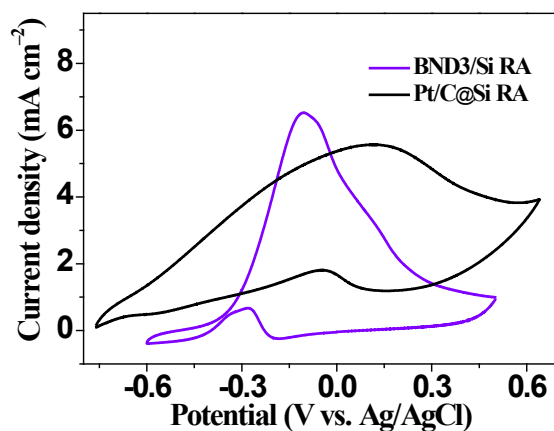

**Fig. S4** The cyclic voltammograms of BND3/Si RA and Pt/C@Si RA for methanol oxidation in 0.1 M KOH electrolyte containing 1.0 M CH<sub>3</sub>OH at a scan rate of 50 mV s<sup>-1</sup>.

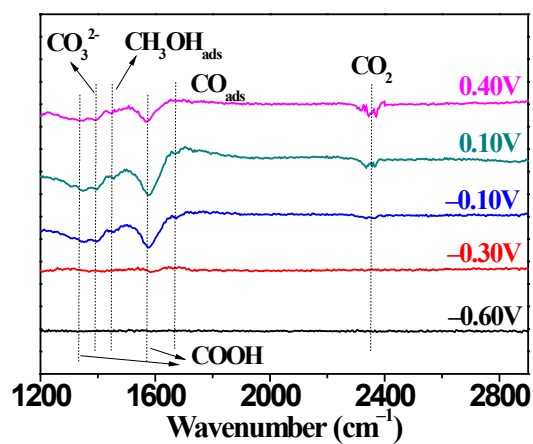

**Fig. S5** In situ infrared spectrum of methanol electrooxidation at BND3/Si RA under different potentials in 0.1 M KOH.

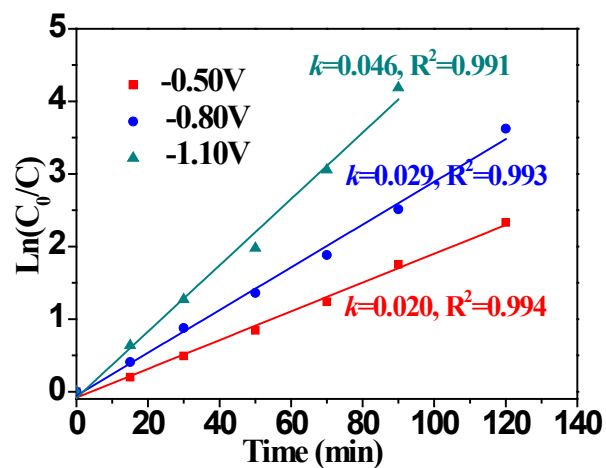

**Fig. S6** Pseudo-first-order plots of BDE-47 reduction on VA-BND3/Si RA under different potentials.

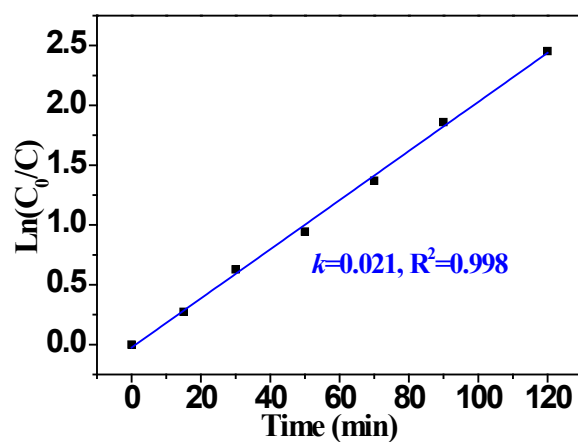

**Fig. S7** Pseudo-first-order plots of BDE-47 reduction on Pd electrode under -0.80 V.
